# Supplementary material for: Ras oncogene-independent activation of RALB signaling is a targetable mechanism of escape from NRAS(V12) oncogene addiction in acute myeloid leukemia
Source: PubMed Central journal article supplement (PMC5464975; doi:10.1038/onc.2016.471), 2016-12-19
Supplement: NIHMS828937-supplement-1.pdf [file NIHMS828937-supplement-1.pdf]

### Supplemental Figure S1

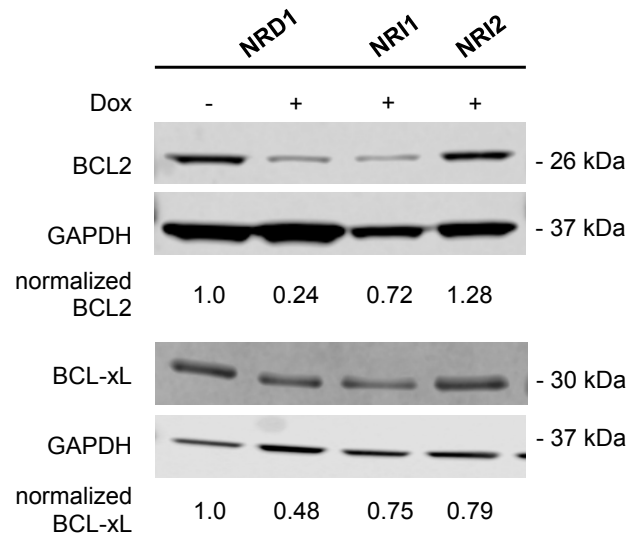

**Supplemental Figure S1. Expression of BCL2 and BCL-xL proteins in *de novo* NRD and relapsed NRI AMLs by Western blotting.** Western blotting for BCL2 (top) and BCL-xL (bottom) protein levels in splenocytes from leukemic mice with untreated NRD AML, 72 hour Dox treated NRD AML, NRI1 AML, or NRI2 AML. Corresponding GAPDH loading control and GAPDH-normalized quantitation of BCL2 or BCL-xL expression levels are shown.

## Supplemental Figure S2

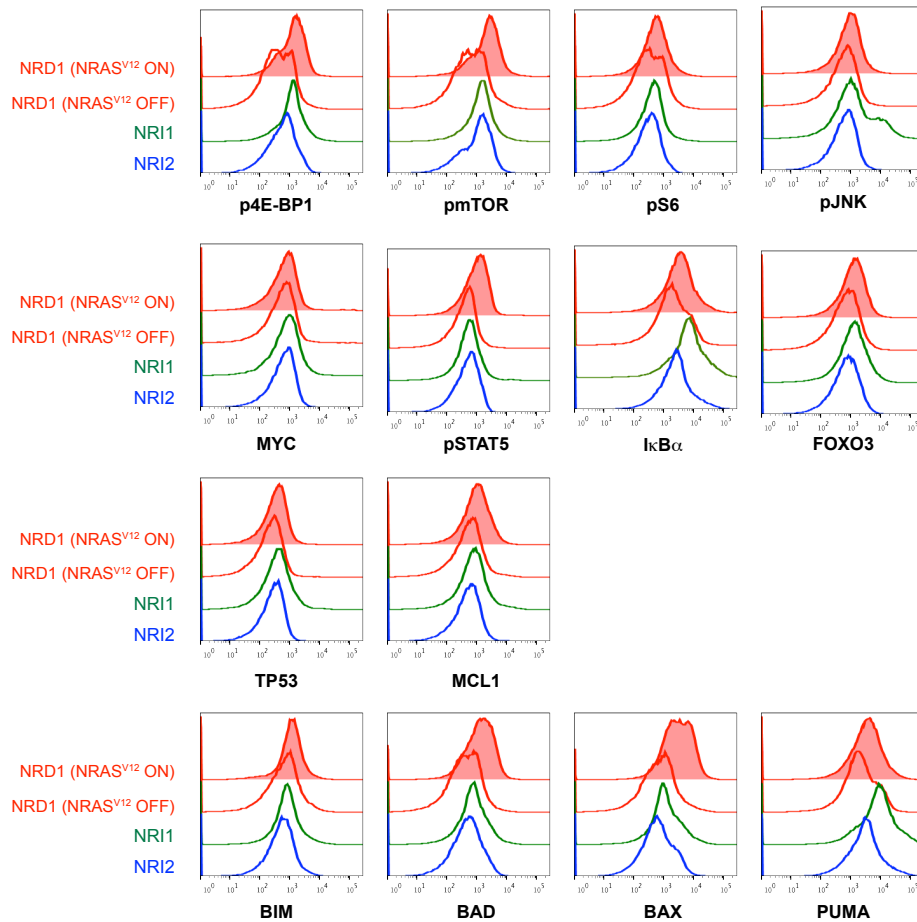

**Supplemental Figure S2. Analysis of cancer signaling pathways in *de novo* NRD and relapsed NRI AMLs using flow cytometry.** Flow cytometry analysis of signaling through cancer signaling pathways in splenocytes harvested from leukemic mice with untreated NRD AML (red shaded histograms), 72 hour Dox treated NRD AML (red open histograms), NRI1 AML (green open), or NRI2 AML (blue open). All mice with NRI AMLs were maintained on Dox to suppress *NRAS(V12)* expression.

### Supplemental Figure S3

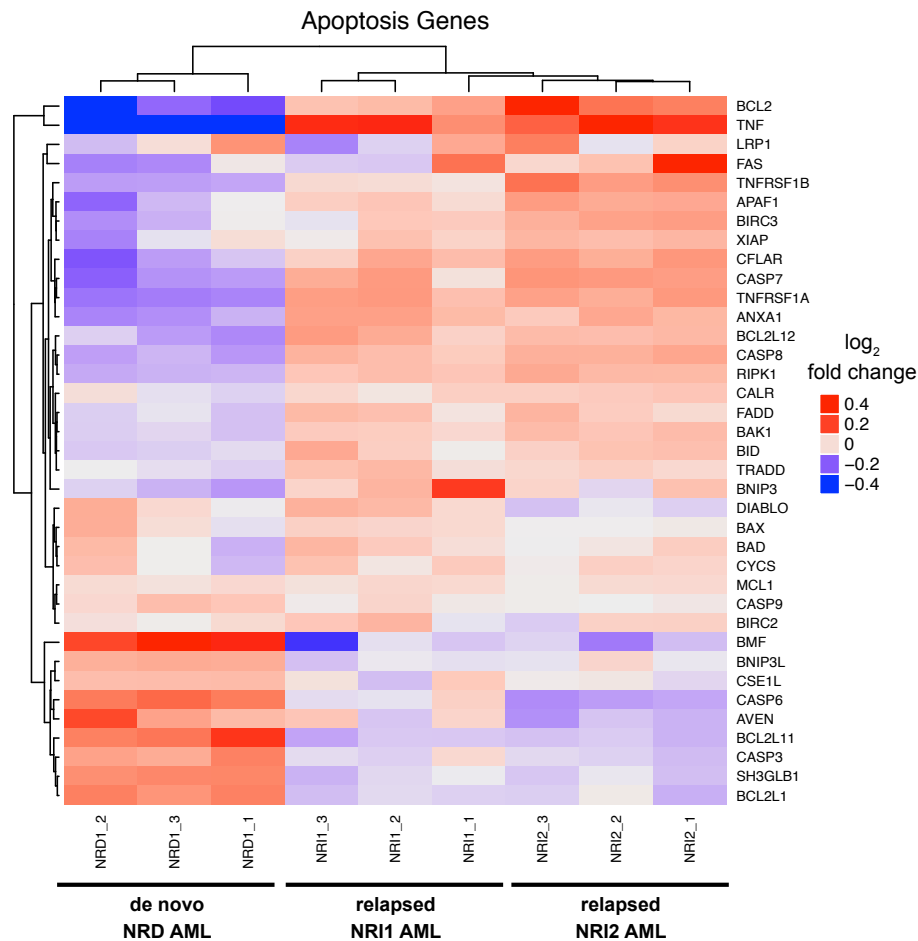

**Supplemental Figure S3. Differential expression of apoptosis-associated transcripts between *de novo* NRD and relapsed NRI AMLs.** Heatmap for differential apoptosis-associated transcript levels between splenocytes from leukemic mice with *de novo* NRD AML after 72 hours of Dox treatment and relapsed NRI1 and NRI2 AMLs (n = 3 independent mice per group, differential expression defined as Benjamini-Hochberg corrected q-value of  $\leq 0.01$  and  $\geq 1.5$  fold change). All mice with NRI AMLs were maintained on Dox to suppress *NRAS(V12)* expression.

Supplemental Figure S4

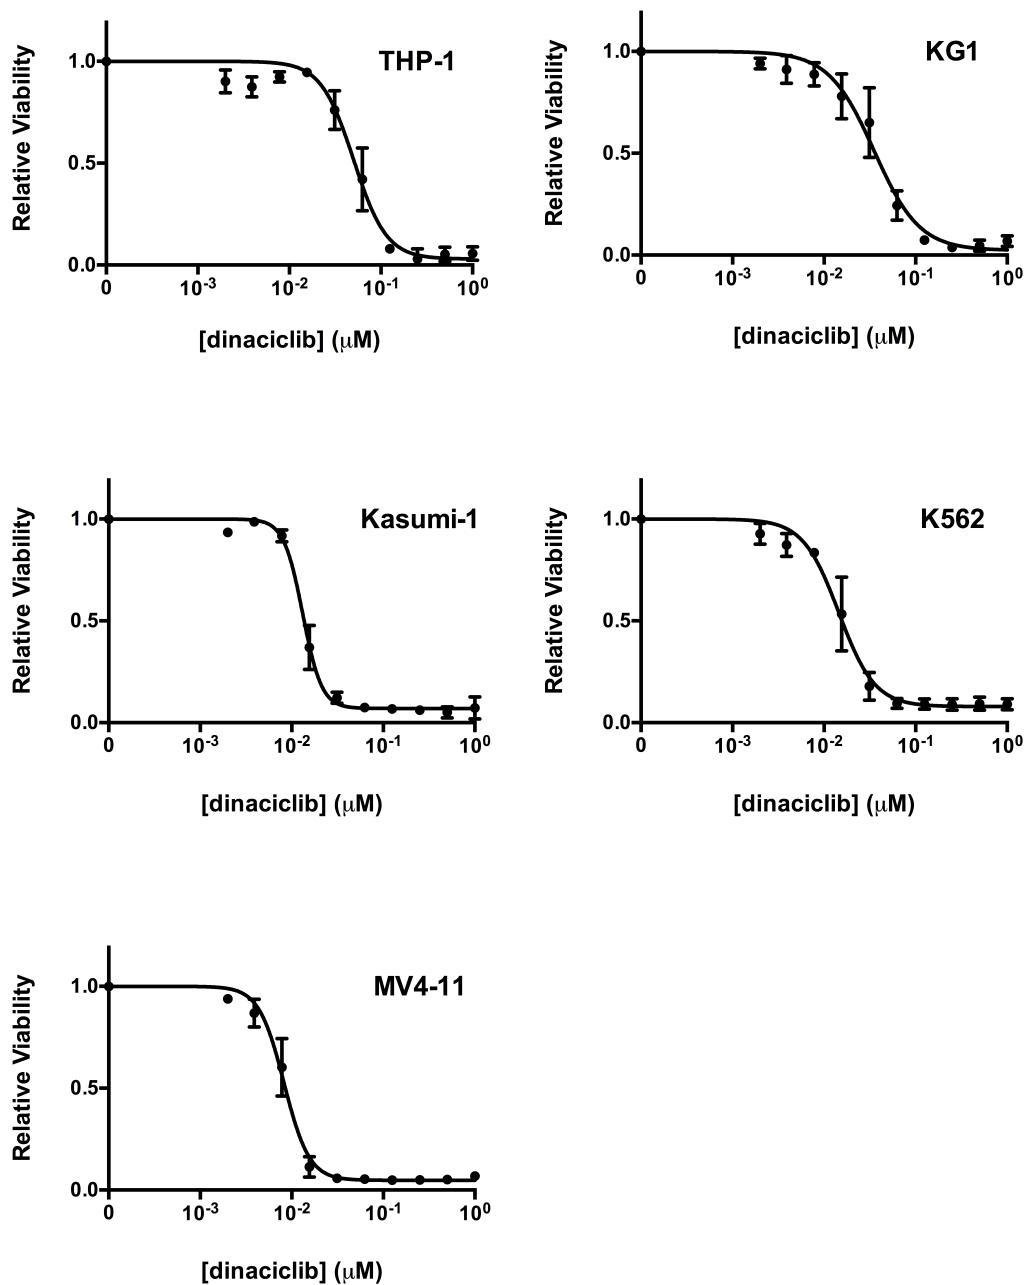

**Supplemental Figure S4. Dinaciclib potently reduces viable cell numbers of genetically diverse human AML cell lines.** MTS analysis of viable AML cell numbers 72 hours after dinaciclib treatment (n = 3-5 independent experiments, error bars = standard error of the mean).

Table S1. Normalized RPPA Data.

| Antibody Name      | Gene Name | normalized log <sub>2</sub> signal |         |         |         |         |         |         |         |         |  |
|--------------------|-----------|------------------------------------|---------|---------|---------|---------|---------|---------|---------|---------|--|
|                    |           | NRD 001                            | NRD 002 | NRD 003 | NRI1001 | NRI1002 | NRI1003 | NRI2001 | NRI2002 | NRI2003 |  |
| 14-3-3-beta        | YWHAH     | 0.000                              | -0.083  | -0.128  | -0.096  | -0.064  | -0.026  | 0.170   | 0.289   | 0.168   |  |
| 14-3-3-epsilon     | YWHAH     | -0.010                             | -0.017  | 0.061   | -0.282  | -0.275  | -0.261  | 0.009   | -0.157  | 0.000   |  |
| 14-3-3-zeta        | YWHAZ     | -0.122                             | -0.072  | -0.167  | 0.583   | 0.434   | 0.337   | 0.464   | 0.364   | 0.033   |  |
| 4E-BP1             | EIF4EBP1  | 0.050                              | 0.041   | -0.215  | -0.955  | -0.588  | -0.696  | -0.323  | -0.891  | 0.000   |  |
| 4E-BP1_pS65        | EIF4EBP1  | 0.000                              | 0.184   | -0.530  | -0.198  | -0.470  | 0.007   | -0.027  | -0.247  | 0.017   |  |
| 4E-BP1_pT37_T46    | EIF4EBP1  | 0.209                              | 0.639   | 0.000   | -0.786  | -0.466  | -0.042  | -0.046  | -0.590  | -0.685  |  |
| 53BP1              | TP53BP1   | -0.011                             | 0.080   | 0.000   | 0.824   | 0.299   | 0.086   | 0.216   | 0.503   | -0.026  |  |
| A-Raf              | ARAF      | -0.022                             | -0.111  | -0.122  | 0.783   | 0.572   | 0.136   | 0.184   | 0.400   | -0.118  |  |
| ACC1               | ACACA     | 0.046                              | -0.011  | -0.200  | -0.216  | -0.028  | -0.006  | 0.164   | 0.196   | 0.000   |  |
| ACC_pS79           | ACACA     | -0.115                             | -0.217  | -0.745  | -0.147  | 0.122   | 0.096   | 0.371   | 0.397   | 0.410   |  |
| ACVRL1             | ACVRL1    | -0.111                             | -0.151  | -0.124  | 0.116   | 0.223   | 0.136   | 0.649   | 0.173   | -0.053  |  |
| ADAR1              | ADAR      | 0.000                              | -0.096  | -0.051  | -0.053  | -0.240  | -0.037  | -0.282  | -0.192  | 0.076   |  |
| Akt                | AKT1      | 0.233                              | 0.277   | 0.157   | 0.481   | -0.136  | -0.257  | -0.127  | 0.160   | -0.285  |  |
| Akt_pS473          | AKT1      | 0.000                              | -0.217  | 0.269   | 0.874   | 0.257   | 0.568   | 0.266   | 0.553   | 0.000   |  |
| Akt_pT308          | AKT1      | 0.000                              | -0.139  | 0.037   | -0.147  | -0.261  | -0.384  | -0.230  | -0.211  | -0.253  |  |
| AMPKa              | PRKAA1    | 0.104                              | 0.008   | -0.020  | 0.033   | 0.012   | -0.037  | 0.192   | 0.148   | 0.000   |  |
| AMPKa_pT172        | PRKAA1    | 0.103                              | 0.054   | -0.189  | -0.167  | -0.466  | -0.535  | 0.113   | 0.095   | 0.000   |  |
| Annexin-I          | ANXA1     | 0.000                              | -0.217  | 0.000   | 0.874   | 0.278   | 0.136   | 0.266   | 0.553   | 0.000   |  |
| Annexin-VII        | ANXA7     | 0.083                              | -0.070  | -0.181  | 0.254   | 0.203   | 0.136   | -0.176  | -0.152  | -0.242  |  |
| AR                 | AR        | -0.011                             | -0.363  | 0.223   | -0.358  | 0.241   | 0.136   | -0.165  | 0.309   | 0.176   |  |
| ARHI               | DIRAS3    | -0.013                             | -0.044  | -0.001  | 0.337   | 0.121   | 0.048   | 0.266   | 0.267   | 0.031   |  |
| ARID1A             | ARID1A    | 0.000                              | -0.217  | 0.000   | 0.874   | 0.257   | 0.136   | 0.266   | 0.553   | 0.000   |  |
| Atg3               | ATG3      | 0.000                              | 0.162   | -0.244  | -0.023  | -0.145  | 0.131   | 0.303   | 0.146   | -0.246  |  |
| Atg7               | ATG7      | 0.480                              | 0.359   | 0.185   | -0.972  | -1.332  | -1.015  | -1.091  | -1.197  | -0.891  |  |
| ATM                | ATM       | 0.056                              | -0.033  | 0.000   | 0.874   | 0.257   | 0.136   | 0.266   | 0.553   | 0.344   |  |
| ATM_pS1981         | ATM       | -0.012                             | 0.048   | 0.000   | -0.059  | 0.081   | -0.108  | -0.122  | -0.144  | 0.060   |  |
| ATP5A              | ATP5A     | 0.000                              | 0.235   | -0.131  | 0.736   | 0.119   | -0.002  | 0.243   | 0.415   | 0.005   |  |
| ATR_pS428          | ATR       | 0.158                              | 0.081   | -0.106  | -0.290  | 0.001   | 0.006   | -0.078  | -0.033  | 0.000   |  |
| Aurora-B           | AIM1      | -0.014                             | -0.080  | 0.000   | 0.045   | 0.162   | -0.083  | 0.055   | -0.154  | 0.154   |  |
| Axl                | AXL       | -0.303                             | 0.004   | -0.191  | 0.538   | 0.198   | 0.136   | -0.070  | 0.217   | 0.107   |  |
| b-Actin            | ACTB      | 0.296                              | 0.130   | 0.000   | -0.381  | -0.409  | -0.641  | -0.087  | -0.016  | -0.731  |  |
| b-Catenin          | CTNNB1    | 0.000                              | -0.217  | 0.000   | 0.874   | 0.257   | 0.136   | 0.266   | 0.553   | 0.000   |  |
| b-Catenin_pT41_S45 | CTNNB1    | 0.135                              | -0.053  | 0.000   | 0.017   | -0.126  | 0.026   | -0.381  | -0.419  | -0.196  |  |
| B-Raf              | BRAF      | 0.000                              | -0.250  | 0.054   | -0.150  | 0.094   | 0.094   | -0.054  | 0.108   | 0.011   |  |
| B-Raf_pS445        | BRAF      | 0.206                              | 0.202   | 0.000   | -0.530  | -0.513  | -0.354  | -0.025  | -0.317  | -0.125  |  |
| B7-H3              | CD276     | 0.000                              | 0.216   | -0.313  | 0.228   | -0.172  | 0.186   | -0.119  | -0.115  | -0.190  |  |
| B7-H4              | VTCN1     | -0.020                             | 0.052   | 0.000   | -0.397  | -0.081  | 0.044   | 0.053   | -0.077  | 0.171   |  |
| Bad_pS112          | BAD       | 0.295                              | 0.132   | 0.000   | -0.754  | -0.535  | -0.587  | -0.333  | -0.363  | -0.116  |  |
| Bak                | BAK1      | 0.000                              | -0.062  | -0.054  | -0.076  | -0.040  | -0.071  | 0.037   | 0.161   | 0.041   |  |
| BAP1               | BAP1      | 0.189                              | 0.092   | -0.305  | -0.176  | -0.233  | -0.231  | -0.154  | -0.020  | 0.293   |  |
| Bax                | BAX       | 0.128                              | 0.094   | 0.000   | -1.196  | -0.879  | -0.534  | -0.450  | -1.016  | -0.564  |  |
| Bcl-xl             | BCL2L1    | -0.068                             | -0.027  | -0.080  | -0.165  | 0.177   | 0.055   | 0.266   | 0.066   | 0.042   |  |
| Bcl2               | BCL2      | -0.278                             | -0.007  | 0.027   | 0.000   | 0.155   | 0.061   | -0.033  | -0.443  | 0.000   |  |
| Bcl2A1             | BCL2A1    | -0.025                             | -0.204  | 0.000   | -0.041  | -0.021  | -0.041  | 0.028   | 0.002   | 0.074   |  |
| Beclin             | BECN1     | 0.000                              | -0.101  | -0.237  | -0.921  | -0.277  | -0.290  | 0.011   | -0.108  | 0.050   |  |
| Bid                | BID       | 0.026                              | 0.186   | 0.000   | -0.330  | -0.328  | -0.259  | -0.113  | -0.318  | -0.106  |  |
| Bim                | BCL2L11   | 0.112                              | 0.078   | 0.000   | -1.317  | -1.028  | -0.804  | -0.601  | -0.752  | -0.511  |  |
| BRD4               | BRD4      | -0.122                             | 0.179   | 0.049   | 0.281   | 0.338   | -0.151  | -0.273  | -0.040  | -0.278  |  |
| c-Abl              | ABL1      | 0.023                              | -0.089  | -0.116  | -0.174  | -0.007  | -0.082  | 0.112   | 0.101   | 0.000   |  |
| c-Jun_pS73         | JUN       | 0.000                              | 0.101   | -0.183  | 0.063   | 0.132   | 0.045   | 0.007   | 0.036   | 0.029   |  |
| c-Kit              | KIT       | -0.043                             | -0.211  | 0.086   | -0.173  | 0.058   | 0.031   | -0.269  | -0.193  | 0.000   |  |
| c-Met_pY1234_Y1235 | MET       | 0.000                              | -0.173  | -0.010  | -0.066  | 0.051   | 0.065   | 0.068   | 0.113   | 0.142   |  |
| c-Myc              | MYC       | 0.000                              | 0.020   | -0.118  | 0.038   | -0.030  | 0.073   | 0.231   | 0.346   | 0.126   |  |
| C-Raf              | RAF1      | 0.000                              | -0.044  | -0.052  | -0.150  | -0.423  | -0.457  | -0.341  | -0.233  | 0.008   |  |
| C-Raf_pS338        | RAF1      | 0.019                              | -0.095  | 0.000   | 0.071   | 0.060   | -0.008  | 0.111   | -0.074  | -0.044  |  |
| Caspase-3          | CASP3     | -0.096                             | -0.181  | 0.000   | -0.184  | 0.072   | 0.020   | 0.108   | 0.132   | 0.086   |  |
| Caspase-7-cleaved  | CASP7     | 0.000                              | -0.023  | 0.248   | 0.422   | 0.296   | -0.234  | 0.179   | 0.643   | 0.233   |  |
| Caveolin-1         | CAV1      | -0.213                             | -0.050  | 0.000   | 0.482   | 0.322   | -0.037  | -0.015  | 0.161   | -0.027  |  |
| CD171              | L1CAM     | 0.101                              | 0.159   | 0.071   | 0.255   | 0.257   | 0.018   | -0.242  | -0.095  | -0.029  |  |
| CD26               | DPP4      | 0.112                              | 0.007   | 0.000   | -0.247  | -0.168  | -0.187  | 0.105   | 0.416   | -0.065  |  |
| CD29               | CD29      | -0.159                             | 0.166   | -0.123  | 0.049   | 0.257   | 0.242   | -0.072  | -0.062  | -0.064  |  |
| CD31               | PECAM1    | 0.000                              | -0.046  | -0.049  | -0.131  | 0.043   | 0.087   | -0.213  | -0.189  | 0.137   |  |
| CD44               | CD44      | 0.246                              | 0.292   | -0.076  | 0.117   | -0.001  | 0.136   | -0.171  | -0.056  | 0.146   |  |
| CD49b              | ITGA2     | 0.000                              | -0.133  | -0.004  | -0.062  | -0.061  | -0.125  | 0.236   | -0.004  | 0.028   |  |
| cdc25C             | CDC25C    | -0.149                             | -0.156  | -0.905  | -0.685  | -0.466  | 0.136   | -0.274  | 0.184   | 0.356   |  |
| CDK1               | CDK1      | -0.387                             | -0.488  | -0.555  | 0.121   | 0.087   | 0.136   | 0.289   | 0.419   | 0.831   |  |
| Chk1               | CHEK1     | 0.146                              | -0.140  | -0.171  | 0.479   | 0.075   | 0.022   | -0.129  | 0.158   | 0.000   |  |
| Chk1_pS296         | CHEK1     | 0.145                              | 0.076   | 0.082   | -0.722  | -0.931  | -1.051  | -0.769  | -0.719  | -0.708  |  |
| Chk1_pS345         | CHEK1     | 0.062                              | -0.142  | -0.100  | -0.385  | -0.366  | -0.113  | -0.082  | -0.239  | 0.000   |  |
| Chk2               | CHEK2     | 0.188                              | 0.354   | 0.000   | 0.229   | -0.019  | 0.051   | 0.109   | -0.126  | -0.008  |  |
| Chk2_pT68          | CHEK2     | -0.106                             | -0.061  | -0.243  | 0.110   | 0.275   | 0.136   | -0.203  | -0.043  | -0.027  |  |
| Claudin-7          | CLDN7     | -0.005                             | 0.161   | 0.104   | 0.010   | -0.123  | 0.018   | -0.318  | -0.177  | 0.000   |  |
| COG3               | COG3      | 0.000                              | 0.089   | -0.050  | 0.127   | -0.058  | -0.095  | -0.050  | -0.154  | 0.122   |  |
| Collagen-VI        | COL6A1    | 0.022                              | -0.157  | -0.119  | 0.682   | 0.097   | 0.030   | 0.337   | 0.458   | -0.103  |  |
| Complex-II-Subunit | SDHB      | -0.175                             | -0.217  | -0.445  | 0.283   | 0.037   | -0.111  | 0.517   | 0.285   | 0.165   |  |
| Connexin-43        | CNST43    | 0.057                              | 0.070   | 0.028   | 0.422   | 0.184   | -0.167  | -0.187  | 0.101   | -0.319  |  |
| Coup-TFII          | NR2F2     | 0.000                              | 0.120   | 0.032   | -0.003  | 0.172   | 0.000   | 0.028   | 0.135   | -0.009  |  |
| Cox-IV             | PTGS3     | -0.038                             | -0.166  | -0.094  | 0.065   | 0.106   | 0.046   | 0.266   | 0.232   | 0.037   |  |

|                    |             |        |        |        |        |        |        |        |        |        |
|--------------------|-------------|--------|--------|--------|--------|--------|--------|--------|--------|--------|
| Cox2               | CMC2        | -0.003 | 0.027  | -0.089 | 0.072  | 0.122  | 0.136  | 0.228  | 0.234  | 0.099  |
| CXCR4              | CXCR4       | 0.049  | 0.010  | 0.000  | 0.189  | -0.102 | -0.147 | 0.009  | 0.189  | -0.162 |
| Cyclin-B1          | CCNB1       | 0.000  | -0.217 | 0.021  | 0.874  | 0.257  | 0.136  | 0.266  | 0.553  | 0.040  |
| Cyclin-D1          | CCND1       | -0.004 | 0.028  | 0.000  | 0.130  | 0.142  | 0.116  | 0.207  | -0.086 | 0.130  |
| Cyclin-E1          | CCNE1       | 0.183  | 0.321  | -0.003 | -0.031 | -0.006 | -0.008 | 0.086  | 0.269  | 0.000  |
| Cyclophilin-F      | PPIF        | -0.899 | -0.510 | -0.565 | 0.442  | 0.102  | 0.136  | 0.486  | 0.231  | 0.125  |
| D-a-Tubulin        | TUBA1A      | 0.000  | 0.014  | -0.158 | 0.143  | 0.169  | 0.060  | 0.283  | 0.167  | -0.024 |
| DJ1                | PARK7       | 0.149  | 0.021  | 0.000  | -0.116 | -0.088 | -0.203 | -0.201 | -0.140 | -0.218 |
| DM-Histone-H3      | HISTH3      | 0.008  | -0.061 | -0.217 | -0.087 | -0.087 | -0.036 | 0.266  | 0.177  | -0.046 |
| DM-K9-Histone-H3   | H3K9ME2     | 0.024  | -0.109 | -0.247 | -0.108 | 0.015  | 0.057  | 0.198  | 0.139  | 0.000  |
| DUSP4              | DUSP4       | -0.004 | -0.009 | -0.205 | 0.036  | 0.222  | 0.136  | -0.037 | -0.072 | 0.036  |
| Dvl3               | DVL3        | 0.265  | 0.096  | 0.000  | -0.554 | -0.363 | -0.301 | -0.088 | -0.227 | -0.169 |
| E-Cadherin         | CDH1        | 0.601  | 0.363  | -0.151 | 0.567  | -0.049 | 0.367  | -0.014 | 0.246  | 0.000  |
| E2F1               | E2F1        | 0.044  | -0.080 | -0.041 | -0.149 | 0.145  | -0.040 | -0.228 | -0.072 | 0.000  |
| eEF2               | EEF2        | 0.037  | -0.003 | -0.078 | -0.179 | 0.165  | 0.136  | 0.115  | -0.067 | -0.150 |
| eEF2K              | EEF2K       | 0.000  | -0.027 | 0.000  | 0.874  | 0.257  | 0.136  | 0.266  | 0.553  | 0.000  |
| EGFR               | EGFR        | -0.107 | 0.080  | -0.071 | 0.248  | -0.150 | 0.136  | 0.169  | -0.051 | 0.255  |
| EGFR_pY1068        | EGFR        | -0.695 | 0.145  | -0.302 | -0.231 | -0.074 | 0.136  | 0.271  | -0.467 | -0.152 |
| EGFR_pY1173        | EGFR        | 0.000  | -0.159 | -0.003 | -0.246 | -0.229 | -0.221 | 0.115  | 0.124  | 0.042  |
| eIF4E              | EIF4E       | -0.023 | -0.073 | -0.112 | 1.480  | 1.159  | 0.801  | 0.347  | 0.335  | 0.000  |
| eIF4G              | EIF4G1      | 0.000  | -0.217 | 0.024  | 0.874  | 0.257  | 0.136  | 0.266  | 0.553  | 0.000  |
| Elk1_pS383         | ELK1        | -0.097 | -0.152 | -0.082 | -0.273 | -0.114 | 0.314  | -0.139 | -0.321 | 0.000  |
| EMA                | EMA         | 0.007  | -0.217 | 0.159  | -0.099 | 0.339  | -0.152 | -0.155 | -0.370 | -0.024 |
| ER                 | ESR1        | 0.085  | 0.054  | -0.086 | -0.165 | -0.001 | 0.136  | 0.076  | -0.211 | -0.047 |
| ERCC1              | ERCC1       | 0.062  | -0.057 | -0.040 | -0.128 | -0.022 | -0.147 | 0.144  | 0.249  | 0.000  |
| ERCC5              | ERCC5       | 0.000  | 0.296  | 0.296  | 0.477  | -0.044 | -0.061 | 0.036  | 0.156  | -0.128 |
| Ets-1              | ETS1        | -0.092 | -0.168 | 0.032  | -0.357 | -0.237 | -0.333 | 0.009  | 0.068  | 0.000  |
| FAK                | PTK2        | -0.095 | -0.217 | 0.050  | 0.183  | 0.079  | -0.112 | -0.117 | -0.187 | 0.046  |
| FAK_pY397          | PTK2        | -0.331 | 0.096  | -0.100 | -0.017 | 0.128  | 0.301  | 0.191  | -0.426 | 0.000  |
| FASN               | FASN        | 0.000  | -0.171 | -0.018 | -0.028 | 0.219  | -0.021 | -0.287 | -0.136 | 0.039  |
| Fibronectin        | FN1         | -0.077 | 1.293  | -0.116 | -0.694 | -0.103 | -0.703 | 1.940  | 0.553  | -1.346 |
| FoxM1              | FOXM1       | -0.134 | 0.176  | -0.032 | 0.192  | -0.158 | 0.039  | 0.266  | 0.243  | 0.413  |
| FoxO3a             | FOX3        | 0.272  | 0.105  | 0.000  | -0.374 | -0.129 | 0.013  | -0.215 | -0.391 | -0.397 |
| FoxO3a_pS318_S321  | FOXO3       | 0.080  | 0.051  | 0.000  | -0.105 | -0.184 | 0.005  | -0.279 | -0.241 | -0.049 |
| FRA-1              | FOSL1       | -0.005 | 0.347  | 0.000  | 0.534  | 0.115  | 0.127  | 0.129  | 0.357  | 0.002  |
| G6PD               | G6PD        | 0.000  | 0.055  | -0.009 | 0.154  | 0.084  | -0.059 | 0.221  | 0.323  | 0.149  |
| Gab2               | GAB2        | 0.066  | -0.068 | 0.000  | 0.485  | -0.096 | -0.084 | 0.025  | 0.164  | -0.245 |
| GAPDH              | GAPDH       | 0.000  | 0.378  | 0.089  | 0.004  | 0.150  | 0.085  | -0.466 | -0.383 | -0.015 |
| GATA3              | GATA3       | 0.000  | 0.000  | 0.010  | -0.008 | 0.106  | 0.000  | -0.185 | -0.058 | -0.039 |
| GCN5L2             | KAT2A       | -0.246 | -0.128 | -0.385 | -0.286 | 0.044  | 0.181  | 0.266  | -0.009 | -0.171 |
| Glutamate-D1-2     | GLUD        | -0.124 | 0.353  | 0.051  | -0.573 | -0.344 | -0.293 | -0.500 | -0.397 | 0.000  |
| Glutaminase        | GLS         | 0.064  | -0.174 | 0.000  | -0.092 | -0.316 | -0.028 | -0.417 | -0.383 | -0.320 |
| GPBB               | PYGM        | 0.155  | 0.139  | 0.000  | -0.080 | -0.085 | -0.155 | 0.055  | -0.075 | -0.121 |
| GSK-3a-b           | GSK3A/GSK3B | 0.081  | 0.177  | 0.330  | -0.070 | -0.013 | -0.052 | 0.193  | 0.396  | 0.000  |
| GSK-3a-b_pS21_S9   | GSK3A GSK3B | 0.455  | 0.288  | 0.000  | 0.522  | -0.095 | -0.050 | -0.086 | 0.201  | -0.352 |
| Gys                | GYS1        | 0.105  | 0.063  | -0.192 | 0.881  | 0.395  | 0.447  | 0.169  | 0.146  | 0.038  |
| Gys_pS641          | GYS1        | 0.788  | 0.613  | 0.339  | -0.765 | -0.889 | -0.628 | -1.120 | -0.907 | 0.000  |
| H2AX_pS140         | H2AFX       | 0.000  | -0.074 | 0.014  | -0.167 | -0.087 | -0.097 | -0.108 | -0.070 | -0.142 |
| HER2               | ERBB2       | 0.000  | 0.055  | 0.000  | 0.874  | 0.257  | 0.170  | 0.266  | 0.553  | 0.000  |
| HER2_pY1248        | ERBB2       | -0.088 | 0.345  | -0.120 | 0.147  | 0.132  | 0.180  | -0.062 | -0.198 | 0.000  |
| HER3               | ERBB3       | 0.000  | -0.014 | -0.054 | 0.126  | -0.263 | 0.152  | 0.083  | 0.125  | -0.124 |
| HER3_pY1289        | ERBB3       | 0.094  | 0.019  | 0.000  | -0.274 | -0.179 | -0.071 | -0.231 | -0.173 | -0.009 |
| Heregulin          | NRG1        | -0.011 | -0.064 | -0.009 | 0.069  | 0.257  | -0.010 | 0.247  | 0.163  | 0.181  |
| HES1               | HES1        | 0.000  | -0.098 | -0.744 | -0.043 | -0.376 | 0.004  | -0.578 | -0.407 | 0.143  |
| Hexokinase-II      | HK2         | -0.186 | 0.173  | -0.215 | 0.288  | 0.138  | 0.136  | 0.128  | 0.086  | 0.012  |
| HIAP               | BIRC2       | 0.022  | -0.059 | -0.017 | -0.573 | -0.354 | -0.514 | -0.509 | -0.525 | 0.000  |
| Hif-1-alpha        | HIF1A       | -0.140 | -0.116 | -0.020 | 0.129  | 0.204  | 0.199  | -0.576 | -0.365 | 0.000  |
| Histone-H3         | HIST3H3     | 0.086  | 0.165  | -0.380 | -0.285 | 0.257  | 0.149  | 0.234  | -0.164 | -0.116 |
| HSP27              | HSBP1       | 0.187  | 0.243  | -0.155 | -0.125 | -0.176 | -0.149 | 0.130  | 0.029  | 0.000  |
| HSP27_pS82         | HSBP1       | -0.038 | -0.204 | 0.000  | -0.596 | 0.260  | 0.053  | -0.203 | 0.013  | -0.443 |
| HSP70              | HSPA1A      | 0.058  | 0.067  | -0.046 | -0.141 | 0.257  | 0.094  | -0.030 | -0.250 | -0.057 |
| IGF1R_pY1135_Y1136 | IGF1R       | 0.000  | -0.020 | -0.025 | -0.085 | -0.012 | 0.013  | -0.037 | -0.024 | 0.126  |
| IGFBP2             | IGFBP2      | 0.115  | 0.067  | 0.000  | 0.106  | 0.122  | 0.036  | 0.090  | 0.238  | -0.123 |
| IGFBP5             | IGFBP5      | 0.000  | -0.079 | -0.186 | -0.551 | 0.023  | -0.028 | -0.104 | 0.120  | 0.224  |
| IGFBPb             | IGF1R       | -0.040 | 0.226  | -0.016 | 0.051  | 0.071  | 0.136  | -0.014 | -0.143 | 0.012  |
| INPP4b             | INPP4B      | 0.127  | 0.114  | -0.026 | -0.072 | -0.238 | -0.185 | -0.182 | -0.221 | 0.016  |
| IRF-1              | IRF1        | -0.066 | -0.122 | -0.444 | -0.333 | -0.074 | 0.136  | -0.082 | -0.616 | 0.050  |
| IRS1               | IRS1        | -0.067 | -0.069 | 0.000  | 0.161  | -0.067 | -0.078 | -0.117 | 0.068  | 0.092  |
| JAB1               | JAB1        | 0.016  | 0.245  | 0.000  | 0.486  | 0.106  | 0.008  | -0.125 | 0.168  | -0.015 |
| Jagged1            | JAG1        | -0.074 | -0.149 | 0.000  | -0.499 | -0.274 | -0.350 | -0.593 | -0.262 | 0.003  |
| Jak2               | JAK2        | 0.006  | -0.185 | 0.000  | -0.894 | -0.525 | -0.233 | -0.725 | -1.032 | -0.239 |
| JNK2               | MAPK9       | 0.231  | 0.182  | -0.092 | -0.512 | -0.430 | -0.130 | -0.210 | -0.379 | 0.000  |
| JNK_pT183_Y185     | MAPK8       | -0.031 | -0.101 | 0.000  | 0.102  | 0.165  | 0.102  | 0.097  | 0.140  | 0.018  |
| LC3A-B             | LC3AB       | -0.118 | 0.002  | -0.188 | 0.078  | 0.102  | 0.051  | 0.266  | 0.099  | 0.037  |
| Lck                | LCK         | 0.407  | 0.302  | 0.072  | 0.181  | -0.138 | -0.091 | -0.163 | 0.009  | -0.079 |
| LDHA               | LDHA        | -0.190 | 0.224  | 0.342  | 0.581  | 0.199  | 0.000  | -0.027 | 0.260  | 0.000  |
| MAPK_pT202_Y204    | MAPK3       | -0.018 | -0.025 | -0.096 | 0.034  | 0.129  | 0.136  | -0.051 | 0.065  | 0.101  |
| Mcl-1              | MCL1        | 0.052  | 0.147  | -0.010 | 0.277  | 0.178  | 0.083  | 0.215  | 0.225  | 0.000  |
| MCT4               | SLC16A4     | -0.257 | -0.319 | -0.606 | 0.788  | 0.257  | 0.516  | 0.388  | 0.331  | 0.420  |

|                   |          |        |        |        |        |        |        |        |        |        |
|-------------------|----------|--------|--------|--------|--------|--------|--------|--------|--------|--------|
| MDM2_pS166        | MDM2     | 0.049  | -0.100 | 0.000  | 0.023  | -0.019 | 0.091  | 0.110  | -0.297 | -0.058 |
| MEK1              | MAP2K1   | 0.000  | -0.091 | 0.000  | 0.874  | 0.257  | 0.136  | 0.266  | 0.553  | 0.000  |
| MEK1_pS217_S221   | MAP2K1   | -0.014 | -0.104 | 0.066  | -0.036 | -0.001 | -0.047 | -0.211 | -0.154 | 0.000  |
| MEK2              | MAP2K2   | 0.000  | 0.249  | -0.037 | 0.254  | 0.238  | 0.131  | 0.241  | 0.280  | 0.424  |
| Merlin            | NF2      | -0.006 | -0.011 | 0.000  | -0.067 | -0.417 | -0.536 | -0.565 | -0.388 | 0.058  |
| MIF               | MIF      | 0.000  | 0.018  | -0.440 | -0.425 | -0.365 | 0.047  | 0.190  | 0.043  | 0.361  |
| MIG6              | ERRF1    | -0.035 | -0.053 | 0.000  | -0.069 | -0.062 | -0.122 | 0.086  | 0.057  | 0.205  |
| Mitochondria      | MTCO2    | 0.124  | 0.161  | 0.000  | 0.524  | 0.176  | 0.099  | 0.018  | 0.203  | -0.069 |
| MMP2              | MMP2     | 0.007  | 0.132  | 0.000  | -0.226 | 0.021  | -0.198 | 0.118  | 0.085  | -0.030 |
| Mnk1              | MKNK1    | 0.077  | -0.036 | 0.007  | -0.470 | -0.526 | -0.406 | -0.271 | -0.400 | -0.344 |
| MSH2              | MSH2     | 0.055  | 0.131  | -0.048 | 0.140  | -0.013 | 0.136  | -0.199 | 0.181  | 0.147  |
| MSH6              | MSH6     | -0.079 | 0.027  | 0.000  | 0.395  | -0.065 | 0.046  | -0.025 | 0.221  | 0.137  |
| mTOR              | MTOR     | 0.163  | 0.204  | 0.000  | -1.416 | -1.800 | -1.260 | -1.192 | -1.580 | -0.678 |
| mTOR_pS2448       | MTOR     | 0.096  | 0.246  | 0.000  | -0.215 | 0.087  | -0.007 | 0.123  | 0.251  | -0.042 |
| Myosin-11         | MYH11    | 0.000  | 0.378  | 0.321  | 0.193  | 0.175  | -0.415 | 0.001  | 0.372  | -0.013 |
| Myosin-IIa_pS1943 | MYO2A    | 0.000  | -0.217 | 0.000  | 0.874  | 0.257  | 0.136  | 0.266  | 0.553  | 0.000  |
| Myt1              | MYT1     | 0.058  | 0.061  | -0.109 | 0.140  | 0.222  | 0.136  | 0.068  | -0.294 | -0.048 |
| N-Cadherin        | CDH2     | 0.000  | 0.124  | -0.100 | 0.048  | -0.015 | 0.002  | 0.049  | -0.212 | 0.293  |
| N-Ras             | NRAS     | 0.021  | -0.091 | -0.079 | -0.042 | -0.116 | -0.100 | 0.235  | 0.139  | 0.000  |
| NAPSIN-A          | NAPSA    | -0.016 | -0.217 | 0.011  | -0.108 | 0.027  | -0.020 | -0.049 | 0.237  | 0.602  |
| NDRG1_pT346       | NDRG1    | 0.076  | -0.120 | 0.000  | 0.527  | -0.089 | -0.211 | -0.081 | 0.206  | -0.347 |
| NDUFB4            | NDUFB4   | 0.000  | 0.068  | -0.209 | 0.013  | 0.023  | -0.086 | -0.076 | 0.037  | 0.104  |
| NF-kB-p65_pS536   | NFKB1    | 0.000  | -0.073 | -0.027 | -0.301 | -0.314 | -0.160 | -0.102 | -0.079 | 0.043  |
| Notch1            | NOTCH1   | -0.014 | 0.154  | 0.000  | 0.075  | 0.185  | 0.225  | 0.007  | -0.206 | -0.057 |
| Notch3            | NOTCH3   | 0.055  | 0.096  | -0.079 | 0.087  | -0.067 | -0.047 | 0.112  | 0.103  | 0.000  |
| P-Cadherin        | CDH3     | -0.015 | -0.014 | 0.079  | 0.065  | 0.099  | 0.136  | -0.302 | -0.434 | -0.257 |
| p16INK4a          | CDKN2A   | 0.091  | 0.121  | 0.000  | -0.557 | -0.285 | -0.570 | 0.153  | -0.285 | -0.031 |
| p21               | CDKN1A   | 0.232  | 0.305  | 0.000  | 0.116  | -0.011 | 0.006  | 0.163  | -0.146 | -0.027 |
| p27-Kip-1         | CDKN1B   | -0.033 | -0.217 | 0.017  | -0.167 | 0.037  | -0.127 | -0.273 | 0.104  | 0.018  |
| p27_pT157         | CDKN1B   | 0.033  | -0.130 | -0.061 | 0.060  | 0.163  | 0.049  | 0.123  | -0.104 | 0.000  |
| p27_pT198         | CDKN1B   | 0.082  | -0.021 | 0.000  | 0.116  | 0.134  | 0.060  | 0.139  | 0.212  | -0.051 |
| p38-MAPK          | MAPK14   | 0.450  | 0.588  | 0.457  | -0.694 | -1.859 | -0.674 | 0.038  | 0.391  | 0.000  |
| p38_pT180_Y182    | MAPK14   | 0.848  | 0.102  | -0.355 | 0.844  | -0.600 | -0.851 | -0.123 | 0.553  | 0.455  |
| p44-42-MAPK       | MAPK3    | 0.000  | 0.080  | 0.323  | 0.486  | -0.131 | -0.158 | 0.479  | 0.165  | -0.388 |
| p53               | TP53     | 0.226  | 0.070  | -0.089 | -0.293 | -0.501 | 0.136  | 0.077  | -0.250 | -0.218 |
| p70-S6K1          | RPS6KB1  | 0.000  | -0.047 | 0.670  | 0.874  | 0.358  | 0.136  | 0.266  | 0.553  | 0.000  |
| p70-S6K_pT389     | RPS6KB1  | 0.019  | -0.173 | 0.239  | -1.077 | -0.288 | -0.326 | -0.331 | -0.574 | -0.210 |
| p90RSK_pT573      | RPS6K    | 0.153  | 0.014  | -0.212 | -0.023 | -0.306 | 0.136  | -0.282 | -0.499 | -0.140 |
| PAI-1             | SERPINE1 | 0.056  | 0.095  | -0.042 | 0.061  | 0.070  | 0.089  | 0.013  | -0.237 | 0.000  |
| PAR               | PAR      | 0.000  | -0.040 | 0.109  | -0.038 | -0.014 | -0.426 | 0.279  | -0.165 | 0.089  |
| PARP1             | PARP1    | 0.000  | 0.387  | 0.331  | 0.007  | -0.023 | 0.065  | 0.185  | 0.248  | -0.064 |
| Paxillin          | PXN      | 0.000  | -0.049 | 0.055  | 0.874  | 0.318  | 0.197  | 0.266  | 0.553  | 0.000  |
| PCNA              | PCNA     | 0.120  | -0.056 | 0.000  | -0.133 | -0.117 | -0.239 | 0.189  | -0.317 | -0.013 |
| PD-L1             | CD274    | 0.000  | 0.211  | -0.052 | 0.042  | 0.082  | -0.098 | -0.141 | -0.017 | 0.174  |
| Pdcd-1L1          | PDCD1    | 0.022  | -0.048 | -0.100 | -0.657 | 0.063  | -0.064 | 0.128  | -0.239 | 0.000  |
| Pdcd4             | PDCD4    | 0.358  | 0.044  | -0.123 | -0.244 | 0.102  | 0.136  | 0.126  | 0.066  | -0.208 |
| PDGFR-b           | PDGFR    | -0.032 | 0.352  | 0.498  | 0.142  | 0.179  | -0.637 | 0.577  | 0.375  | -0.473 |
| PDK1              | PDK1     | -0.012 | 0.197  | -0.029 | -0.050 | 0.091  | 0.136  | 0.140  | 0.152  | 1.373  |
| PDK1_pS241        | PDK1     | 0.177  | 0.041  | -0.008 | -0.049 | -0.169 | 0.043  | 0.179  | 0.142  | 0.000  |
| PEA-15            | PEA15    | 0.519  | 0.441  | 0.000  | -0.748 | -0.708 | -0.776 | -0.447 | -0.358 | -0.195 |
| PEA-15_pS116      | PEA15    | 0.000  | -0.130 | -0.154 | 0.027  | -0.021 | -0.133 | 0.126  | 0.211  | 0.061  |
| PI3K-p110-a       | PIK3C2A  | 0.185  | -0.081 | 0.000  | -0.493 | -0.606 | -0.525 | -0.208 | -0.208 | -0.108 |
| PI3K-p110-b       | PIK3BC   | 0.020  | -0.074 | -0.020 | 0.035  | 0.117  | -0.072 | 0.176  | -0.088 | 0.000  |
| PI3K-p85          | PIK3R1   | 0.254  | 0.184  | 0.037  | -1.056 | -1.094 | -0.978 | -0.892 | -0.620 | -0.598 |
| PKA-a             | PRKAR1A  | 0.522  | 0.444  | 0.164  | -1.285 | -1.610 | -1.420 | -1.235 | -1.203 | -0.946 |
| PKC-a             | PRKCA    | 0.096  | 0.017  | 0.000  | 0.163  | -0.129 | -0.054 | -0.295 | 0.108  | -0.102 |
| PKC-a_pS657       | PRKCA    | 0.130  | -0.075 | -0.107 | 0.585  | 0.226  | 0.127  | 0.060  | 0.406  | 0.078  |
| PKC-b-II_pS660    | PRKCB    | 0.584  | 0.580  | 0.374  | -0.697 | -0.761 | -0.650 | -0.180 | -0.315 | -0.289 |
| PKC-delta_pS664   | PRKCD    | 0.066  | -0.015 | -0.031 | 0.202  | 0.192  | 0.136  | -0.197 | -0.122 | -0.118 |
| PKM2              | PKM2     | -0.010 | -0.077 | -0.123 | 0.508  | 0.257  | 0.166  | 0.390  | 0.341  | -0.155 |
| PLC-gamma2_pY759  | PLCG2    | 0.038  | -0.105 | 0.000  | -0.075 | -0.029 | -0.162 | -0.111 | -0.223 | -0.050 |
| PLK1              | PLK1     | 0.053  | -0.217 | 0.344  | 0.874  | 0.462  | 0.136  | 0.266  | 0.553  | 0.000  |
| PMS2              | PMS2     | -0.067 | 0.100  | 0.000  | -0.220 | 0.077  | 0.052  | 0.197  | -0.281 | 0.326  |
| Porin             | VDAC1    | -0.010 | -0.033 | 0.104  | 0.008  | -0.086 | -0.087 | -0.014 | -0.330 | 0.000  |
| PR                | PGR      | 0.010  | -0.101 | 0.000  | -0.217 | -0.157 | -0.289 | -0.384 | -0.290 | -0.174 |
| PRAS40            | AKT1S1   | 0.021  | 0.165  | -0.043 | 0.356  | 0.149  | 0.151  | -0.309 | -0.022 | 0.000  |
| PRAS40_pT246      | AKT1S1   | -0.045 | -0.046 | -0.045 | 0.142  | 0.021  | -0.059 | 0.266  | 0.149  | 0.009  |
| PREX1             | PREX1    | -0.158 | -0.209 | -0.011 | 0.190  | 0.221  | 0.136  | -0.341 | -0.207 | 0.054  |
| PTEN              | PTEN     | 0.141  | 0.169  | 0.000  | -0.220 | -0.308 | -0.047 | -0.010 | -0.126 | -0.087 |
| Puma              | BBC3     | 0.003  | 0.078  | 0.000  | -0.292 | 0.072  | 0.014  | 0.037  | 0.038  | -0.065 |
| PYGM              | PYGM     | 0.000  | 0.124  | -0.113 | -0.449 | -0.436 | -0.440 | 0.115  | -0.112 | 0.068  |
| Rab11             | RAB11A   | 0.000  | -0.032 | 0.094  | -0.335 | -0.049 | -0.214 | -0.204 | -0.051 | -0.025 |
| Rab25             | RAB25    | 0.108  | 0.150  | -0.004 | 0.143  | 0.109  | 0.136  | -0.087 | -0.301 | -0.178 |
| Rad50             | RAD50    | 0.000  | 0.062  | -0.169 | 0.100  | -0.172 | -0.191 | -0.508 | -0.221 | 0.500  |
| Rad51             | RAD51    | -0.063 | -0.095 | 0.000  | 0.045  | 0.106  | 0.123  | 0.106  | -0.099 | 0.013  |
| Raptor            | RPTOR    | 0.090  | -0.078 | 0.000  | -0.364 | -0.416 | -0.428 | -0.392 | -0.176 | -0.010 |
| RBM15             | RBM15    | 0.222  | 0.059  | 0.000  | 0.429  | -0.188 | -0.309 | -0.179 | 0.108  | -0.210 |
| Rb_pS807_S811     | RB1      | 0.000  | -0.089 | 0.087  | 0.874  | 0.257  | 0.136  | 0.266  | 0.553  | 0.000  |
| Rheb              | RHEB     | -0.153 | 0.081  | 0.000  | -0.456 | -0.119 | 0.127  | -0.077 | 0.141  | 0.009  |
| Rictor            | RICTOR   | 0.260  | 0.523  | 0.177  | -0.253 | -0.059 | -0.121 | -0.112 | -0.226 | -0.319 |
| Rictor_pT1135     | RICTOR   | 0.048  | 0.040  | 0.000  | 0.000  | -0.124 | -0.264 | -0.160 | -0.163 | -0.057 |

|                  |         |        |        |        |        |        |        |        |        |        |
|------------------|---------|--------|--------|--------|--------|--------|--------|--------|--------|--------|
| Rock-1           | ROCK1   | 0.038  | 0.167  | 0.000  | 0.025  | 0.041  | 0.002  | 0.026  | -0.193 | -0.206 |
| RPA32            | RPA32   | 0.230  | 0.020  | 0.000  | -0.544 | -0.606 | -0.531 | -0.215 | -0.296 | -0.083 |
| RPA32_pS4_S8     | RPA32   | 0.000  | 0.084  | 0.014  | -0.012 | -0.181 | -0.069 | -0.030 | -0.116 | -0.222 |
| RSK              | RPS6KA1 | 0.062  | 0.008  | -0.030 | 0.300  | 0.113  | 0.136  | 0.206  | 0.208  | -0.141 |
| S6               | RPS6    | 0.065  | 0.113  | 0.000  | -0.736 | -0.678 | -0.768 | -0.206 | -0.390 | -0.182 |
| S6_pS235_S236    | RPS6    | 0.000  | -0.017 | 0.420  | 0.646  | 0.029  | -0.092 | 0.037  | 0.325  | -0.037 |
| S6_pS240_S244    | RPS6    | 0.000  | 0.086  | 0.392  | 0.169  | -0.324 | -0.569 | -0.439 | -0.152 | -0.627 |
| SCD              | SCD     | -0.018 | 0.217  | -0.115 | 0.171  | 0.084  | 0.000  | 0.278  | 0.225  | 0.000  |
| SDHA             | SDHA    | -0.278 | -0.341 | -0.303 | 0.277  | 0.317  | 0.136  | 0.121  | 0.233  | 0.239  |
| SF2              | SRSF1   | 0.019  | -0.100 | 0.000  | -0.294 | -0.009 | 0.011  | -0.377 | -0.240 | -0.373 |
| Shc_pY317        | SHC1    | -0.174 | -0.158 | 0.043  | 0.301  | 0.117  | -0.127 | 0.023  | -0.384 | 0.000  |
| SHP-2_pY542      | PTPN11  | 0.098  | -0.089 | -0.009 | -0.317 | 0.148  | -0.002 | -0.361 | -0.305 | 0.000  |
| SLC1A5           | SLC1A5  | 0.000  | 0.429  | -0.113 | 0.761  | 0.144  | 0.027  | 0.153  | 0.440  | 0.540  |
| Smad1            | SMAD1   | 0.000  | 0.029  | 0.077  | 0.089  | 0.082  | 0.041  | 0.046  | -0.169 | -0.047 |
| Smad3            | SMAD3   | 0.000  | -0.204 | 0.021  | -0.015 | 0.150  | 0.018  | -0.001 | 0.208  | -0.029 |
| Smad4            | SMAD4   | 0.000  | -0.117 | -0.079 | -0.071 | 0.057  | -0.018 | 0.225  | 0.186  | 0.115  |
| SOD2             | SOD2    | -0.288 | -0.217 | -0.360 | 0.028  | 0.098  | 0.040  | 0.317  | 0.171  | 0.112  |
| Sox2             | SOX2    | 0.112  | -0.150 | -0.063 | 0.080  | -0.005 | -0.029 | -0.274 | 0.113  | 0.000  |
| Src              | SRC     | -0.197 | 0.214  | 0.000  | 0.236  | 0.223  | 0.184  | -0.255 | -0.130 | 0.133  |
| Src_pY416        | SRC     | 0.412  | 0.043  | 0.107  | 0.498  | -0.136 | 0.125  | -0.032 | 0.109  | 0.000  |
| Src_pY527        | SRC     | -0.091 | 0.033  | -0.060 | 0.773  | 0.307  | 0.441  | -0.021 | -0.108 | 0.046  |
| Stat3            | STAT3   | 0.637  | 0.630  | 0.096  | -0.882 | -1.499 | -1.447 | -1.172 | -1.203 | -0.990 |
| Stat3_pY705      | STAT3   | 0.123  | 0.296  | 0.000  | -0.006 | -0.117 | -0.214 | -0.350 | -0.234 | -0.301 |
| Stat5a           | STAT5A  | -0.029 | -0.006 | 0.038  | -0.220 | -0.141 | -0.190 | -0.308 | -0.269 | 0.000  |
| Stathmin-1       | STMN1   | -0.060 | -0.115 | -0.089 | 0.165  | 0.169  | 0.110  | 0.266  | 0.314  | 0.133  |
| Syk              | SYK     | 0.000  | 0.034  | -0.109 | 0.702  | 0.161  | 0.083  | 0.093  | 0.381  | 0.050  |
| Tau              | MAPT    | 0.012  | 0.064  | -0.044 | -0.137 | -0.027 | -0.003 | -0.115 | -0.172 | 0.000  |
| TAZ              | TAZ     | 0.013  | -0.124 | 0.000  | 0.118  | -0.081 | -0.179 | -0.325 | -0.203 | -0.305 |
| TFAM             | TFAM    | 0.047  | -0.191 | -0.071 | 0.803  | 0.193  | 0.136  | 0.194  | 0.482  | -0.030 |
| TFRC             | TFRC    | -0.030 | -0.016 | 0.229  | 0.842  | 0.264  | 0.104  | 0.234  | 0.543  | 0.000  |
| TIGAR            | TIGAR   | -0.023 | -0.103 | -0.001 | 0.135  | 0.275  | 0.172  | 0.188  | 0.308  | 0.000  |
| Transglutaminase | TGM2    | -0.018 | -0.172 | -0.009 | -0.291 | -0.339 | -0.448 | 0.288  | 0.484  | 0.817  |
| TSC1             | TSC1    | 0.233  | 0.350  | 0.109  | -0.569 | -0.583 | -0.608 | -0.286 | -0.230 | -0.349 |
| TTF1             | TTF1    | -0.022 | -0.217 | 0.038  | -0.335 | -0.166 | -0.202 | -0.292 | -0.025 | 0.072  |
| Tuberin          | TSC2    | 0.000  | -0.155 | 0.015  | 0.874  | 0.257  | 0.136  | 0.266  | 0.553  | 0.000  |
| Tuberin_pT1462   | TSC2    | 0.000  | -0.058 | -0.175 | -0.197 | -0.217 | -0.258 | -0.135 | 0.090  | 0.033  |
| TWIST            | TWIST1  | 0.000  | -0.093 | -0.014 | 0.005  | 0.156  | -0.003 | -0.173 | 0.032  | 0.087  |
| Tyro3            | TYRO3   | 0.126  | 0.118  | -0.073 | -0.077 | 0.135  | 0.068  | -0.004 | -0.074 | 0.000  |
| UBAC1            | UBAC1   | 0.000  | -0.137 | 0.067  | -0.120 | -0.289 | -0.285 | -0.122 | 0.112  | -0.231 |
| Ubq-Histone-H2B  | H2BFM   | 0.000  | -0.104 | -0.157 | -0.164 | 0.037  | -0.068 | -0.265 | -0.093 | 0.088  |
| UGT1A            | UGT1A   | 0.689  | 0.687  | 0.549  | -0.240 | -0.113 | -0.257 | -0.040 | -0.096 | 0.000  |
| VEGFR-2          | KDR     | 0.349  | 0.449  | 0.000  | -1.208 | -1.082 | -1.119 | -1.127 | -1.224 | -0.526 |
| VHL-EPPK1        | VHL     | 0.000  | 0.000  | 0.200  | 0.738  | 0.121  | 0.097  | 0.273  | 0.509  | -0.017 |
| Vimentin         | VIM     | 0.000  | -0.029 | 0.155  | -0.167 | 0.106  | 0.043  | -0.326 | -0.002 | -0.049 |
| Wee1             | WEE1    | -0.057 | 0.375  | -0.371 | -0.084 | 0.230  | 0.394  | -0.031 | -0.405 | 0.000  |
| XBP-1            | XBP1    | 0.000  | -0.176 | -0.065 | -0.750 | -0.221 | -0.303 | -0.244 | -0.383 | 0.047  |
| XIAP             | XIAP    | 0.458  | 0.391  | 0.000  | -0.232 | -0.372 | -0.219 | -0.242 | -0.314 | -0.328 |
| XPA              | XPA     | 0.021  | 0.108  | 0.077  | 0.592  | -0.013 | 0.039  | 0.127  | 0.271  | -0.025 |
| XPF              | XPF     | 0.000  | -0.047 | -0.068 | 0.175  | 0.124  | 0.014  | -0.518 | 0.300  | 0.057  |
| XRCC1            | XRCC1   | 0.000  | -0.154 | -0.110 | -0.210 | -0.124 | -0.050 | 0.188  | 0.338  | 0.076  |
| YAP              | YAP1    | 0.000  | -0.057 | -0.105 | 0.105  | 0.036  | -0.038 | 0.095  | 0.057  | 0.144  |
| YAP_pS127        | YAP1    | 0.000  | -0.023 | 0.080  | 0.444  | 0.085  | 0.059  | -0.111 | 0.123  | -0.147 |
| YB1              | YBX1    | 0.150  | -0.053 | -0.155 | 0.356  | -0.126 | 0.083  | 0.219  | 0.214  | 0.000  |
| YB1_pS102        | YBX1    | 0.020  | 0.386  | 0.000  | -0.558 | -0.372 | -0.306 | -0.190 | -0.236 | -0.089 |



**Table S2. Top differentially activated/inhibited canonical pathways between NRD and NRI AMLs using Ingenuity Pathway Analysis (IPA).**

| <b>Ingenuity Canonical Pathways</b>                                   | <b>activation z-score</b> | <b>predicted regulation</b> | <b>p value</b> |
|-----------------------------------------------------------------------|---------------------------|-----------------------------|----------------|
| Production of Nitric Oxide and Reactive Oxygen Species in Macrophages | 5.013                     | activated                   | 2.455E-05      |
| Role of NFAT in Regulation of the Immune Response                     | 4.542                     | activated                   | 5.248E-04      |
| Tec Kinase Signaling                                                  | 4.333                     | activated                   | 5.888E-06      |
| CD28 Signaling in T Helper Cells                                      | 4.041                     | activated                   | 8.128E-04      |
| IL-8 Signaling                                                        | 3.857                     | activated                   | 1.862E-06      |
| Leukocyte Extravasation Signaling                                     | 3.742                     | activated                   | 1.318E-10      |
| B Cell Receptor Signaling                                             | 3.507                     | activated                   | 2.089E-05      |
| Signaling by Rho Family GTPases                                       | 3.464                     | activated                   | 7.586E-05      |
| Fc Receptor-mediated Phagocytosis in Macrophages and Monocytes        | 3.307                     | activated                   | 6.026E-07      |
| Rac Signaling                                                         | 3.286                     | activated                   | 2.692E-05      |
| IL-6 Signaling                                                        | 3.182                     | activated                   | 1.148E-04      |
| Actin Cytoskeleton Signaling                                          | 3.015                     | activated                   | 7.244E-04      |
| Dendritic Cell Maturation                                             | 2.967                     | activated                   | 7.079E-05      |
| ERK/MAPK Signaling                                                    | 2.949                     | activated                   | 2.818E-04      |
| Phospholipase C Signaling                                             | 2.777                     | activated                   | 2.042E-04      |
| p38 MAPK Signaling                                                    | 2.414                     | activated                   | 3.162E-04      |
| LPS/IL-1 Mediated Inhibition of RXR Function                          | 2.400                     | activated                   | 5.495E-05      |
| Type II Diabetes Mellitus Signaling                                   | 2.294                     | activated                   | 2.692E-04      |
| Sphingosine-1-phosphate Signaling                                     | 2.263                     | activated                   | 1.122E-05      |
| Ephrin Receptor Signaling                                             | 2.263                     | activated                   | 3.890E-04      |
| Growth Hormone Signaling                                              | 2.236                     | activated                   | 9.120E-05      |
| Fc Epsilon RI Signaling                                               | 2.117                     | activated                   | 8.128E-04      |
| NF-kB Signaling                                                       | 2.111                     | activated                   | 1.479E-04      |
| RhoGDI Signaling                                                      | -2.466                    | inhibited                   | 8.318E-05      |
| PI3K Signaling in B Lymphocytes                                       | -3.087                    | inhibited                   | 2.570E-05      |

**Table S3. Top Ingenuity Pathway Analysis (IPA) predicted upstream regulators of differentially expressed genes.**

| upstream regulator | predicted regulation | activation z-score | p value   |
|--------------------|----------------------|--------------------|-----------|
| CDKN2A             | activated            | 3.834              | 2.110E-10 |
| SMARCA4            | activated            | 2.938              | 3.180E-09 |
| RBL1               | activated            | 2.900              | 1.760E-05 |
| HOXA9              | activated            | 2.865              | 5.420E-07 |
| CEBPE              | activated            | 2.848              | 2.090E-13 |
| RB1                | activated            | 2.683              | 3.570E-06 |
| ETS1               | activated            | 2.635              | 9.490E-10 |
| NFKB1              | activated            | 2.603              | 2.000E-04 |
| HMGAI              | activated            | 2.603              | 6.590E-04 |
| Gm21596/Hmgb1      | activated            | 2.400              | 1.660E-02 |
| CEBPA              | activated            | 2.307              | 2.510E-12 |
| EGR2               | activated            | 2.216              | 1.730E-02 |
| ING1               | activated            | 2.213              | 3.890E-02 |
| SPI1               | activated            | 2.195              | 1.080E-21 |
| BACH1              | activated            | 2.152              | 3.890E-02 |
| CEBPD              | activated            | 2.101              | 1.130E-04 |
| STAT3              | activated            | 2.084              | 1.340E-10 |
| ERG                | activated            | 2.082              | 4.000E-12 |
| TAF4               | activated            | 2.043              | 5.210E-03 |
| Msx3               | inhibited            | -2.000             | 4.440E-03 |
| MITF               | inhibited            | -2.286             | 2.280E-08 |
| PPARGC1A           | inhibited            | -2.319             | 1.350E-02 |
| KLF15              | inhibited            | -2.579             | 3.530E-02 |
| GF11               | inhibited            | -2.906             | 4.180E-05 |
| RUNX3              | inhibited            | -2.929             | 7.600E-05 |
| NFE2               | inhibited            | -2.949             | 1.040E-06 |
| GATA1              | inhibited            | -3.009             | 7.920E-24 |
| SRF                | inhibited            | -3.141             | 2.960E-19 |
| TBX2               | inhibited            | -3.162             | 1.440E-04 |
| E2F3               | inhibited            | -3.289             | 3.790E-07 |
| E2F1               | inhibited            | -4.151             | 3.790E-08 |
| MKL2               | inhibited            | -4.459             | 3.880E-31 |
| MKL1               | inhibited            | -4.631             | 1.780E-25 |

**Table S4. Top differentially expressed transcriptional regulators between NRD and NRI AMLs.**

| log2 expression values |        |        |        |        |        |        |        |        |        |       | NRD vs NRI fold change | corrected q-value |
|------------------------|--------|--------|--------|--------|--------|--------|--------|--------|--------|-------|------------------------|-------------------|
| Gene                   | NRD1_1 | NRD1_2 | NRD1_3 | NRI1_1 | NRI1_2 | NRI1_3 | NRI2_1 | NRI2_2 | NRI2_3 |       |                        |                   |
| <b>up</b>              |        |        |        |        |        |        |        |        |        |       |                        |                   |
| <i>GFI1</i>            | 2.781  | 2.396  | 2.463  | 4.736  | 5.446  | 5.464  | 5.426  | 5.276  | 5.288  | 6.615 | 3.250E-04              |                   |
| <i>CEBPE</i>           | 5.441  | 5.259  | 5.136  | 7.234  | 7.971  | 7.819  | 7.447  | 7.535  | 7.277  | 4.819 | 3.250E-04              |                   |
| <i>ID1</i>             | 3.156  | 3.328  | 3.001  | 4.764  | 5.002  | 5.204  | 4.817  | 4.909  | 4.834  | 3.387 | 3.250E-04              |                   |
| <i>DMRTB1</i>          | 0.729  | 0.595  | 1.063  | 1.955  | 2.606  | 2.567  | 2.557  | 2.466  | 2.324  | 3.068 | 3.250E-04              |                   |
| <i>TFEC</i>            | 2.898  | 3.199  | 2.940  | 4.194  | 4.595  | 4.664  | 4.759  | 4.588  | 4.725  | 2.980 | 3.250E-04              |                   |
| <i>CERS6</i>           | 2.852  | 1.684  | 2.418  | 3.670  | 3.575  | 3.443  | 4.185  | 3.877  | 4.149  | 2.825 | 1.410E-03              |                   |
| <i>LMO1</i>            | 3.094  | 3.198  | 3.173  | 4.327  | 4.831  | 4.903  | 4.552  | 4.722  | 4.566  | 2.819 | 3.250E-04              |                   |
| <i>MYB</i>             | 4.706  | 4.564  | 4.584  | 5.757  | 6.139  | 6.109  | 6.168  | 6.069  | 6.174  | 2.735 | 3.250E-04              |                   |
| <i>DACH1</i>           | 2.415  | 1.722  | 2.037  | 3.175  | 3.535  | 3.456  | 3.591  | 3.549  | 3.618  | 2.693 | 3.250E-04              |                   |
| <i>ARID3A</i>          | 3.845  | 3.396  | 3.553  | 4.867  | 5.192  | 4.937  | 5.093  | 5.039  | 4.975  | 2.674 | 3.250E-04              |                   |
| <b>down</b>            |        |        |        |        |        |        |        |        |        |       |                        |                   |
| <i>PAWR</i>            | 3.358  | 3.393  | 3.267  | 2.337  | 1.993  | 2.223  | 1.788  | 2.116  | 1.991  | 0.416 | 3.250E-04              |                   |
| <i>SOX12</i>           | 3.001  | 3.140  | 2.976  | 2.008  | 1.615  | 1.881  | 1.638  | 1.747  | 1.540  | 0.406 | 3.250E-04              |                   |
| <i>TFDP2</i>           | 6.280  | 5.821  | 6.091  | 4.664  | 4.697  | 4.498  | 4.613  | 5.071  | 4.951  | 0.402 | 3.250E-04              |                   |
| <i>ZFPM1</i>           | 7.682  | 7.690  | 7.670  | 6.751  | 6.537  | 6.521  | 5.794  | 6.306  | 6.117  | 0.394 | 3.250E-04              |                   |
| <i>KLF1</i>            | 8.143  | 8.537  | 8.267  | 7.366  | 7.118  | 7.264  | 6.443  | 7.022  | 6.594  | 0.393 | 3.250E-04              |                   |
| <i>CCNE1</i>           | 7.001  | 7.363  | 7.210  | 6.162  | 5.645  | 6.112  | 5.343  | 5.795  | 5.424  | 0.368 | 3.250E-04              |                   |
| <i>GATA1</i>           | 7.214  | 7.479  | 7.290  | 6.226  | 5.917  | 6.158  | 5.438  | 5.912  | 5.606  | 0.366 | 3.250E-04              |                   |
| <i>SOX6</i>            | 5.323  | 4.545  | 5.066  | 3.733  | 3.305  | 3.145  | 3.260  | 3.866  | 3.683  | 0.359 | 3.250E-04              |                   |
| <i>ZBTB32</i>          | 4.207  | 4.288  | 4.276  | 2.741  | 2.335  | 2.534  | 2.572  | 3.053  | 2.777  | 0.333 | 3.250E-04              |                   |
| <i>GFI1B</i>           | 6.607  | 6.860  | 6.858  | 5.371  | 5.091  | 5.473  | 4.722  | 5.133  | 4.892  | 0.316 | 3.250E-04              |                   |

**Table S5.** Clinical, cytogenetic, and molecular characteristics of primary AML patient samples.

| <b>ID</b> | <b>status</b> | <b>blasts</b> | <b>diagnostic karyotype</b>   | <b>mutation(s)</b>    |
|-----------|---------------|---------------|-------------------------------|-----------------------|
| AML1      | de novo       | 87%           | +6                            | FLT3-ITD              |
| AML2      | de novo       | 87%           | normal                        | NPM1, IDH2(R140W)     |
| AML4      | de novo       | 92%           | del(20)                       | IDH1(R132H)           |
| AML5      | de novo       | 65%           | normal                        | FLT3-ITD              |
| AML8      | relapse       | 70%           | t(1;3),del(5),-7,idem,t(1;17) | KRAS(Q61K),KRAS(Q61H) |
